# Supplementary material
Source: PubMed Central journal article supplement (PMC3246244)
Supplement: ismej201188x1.pdf [file ismej201188x1.pdf]

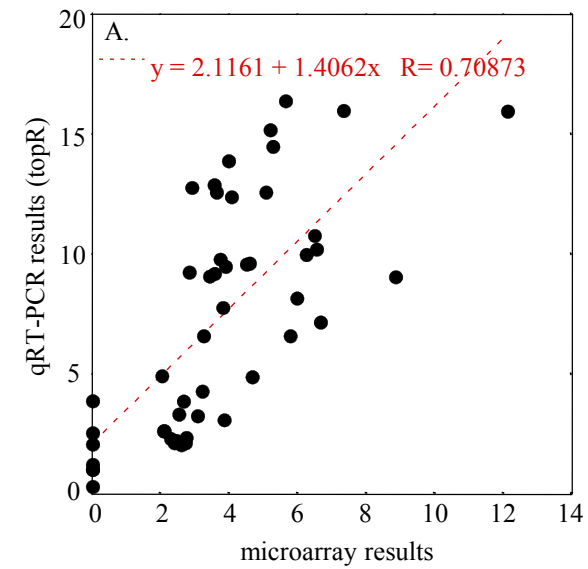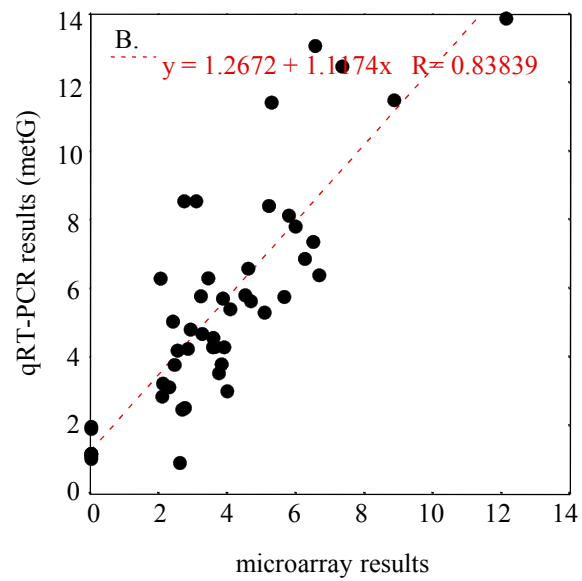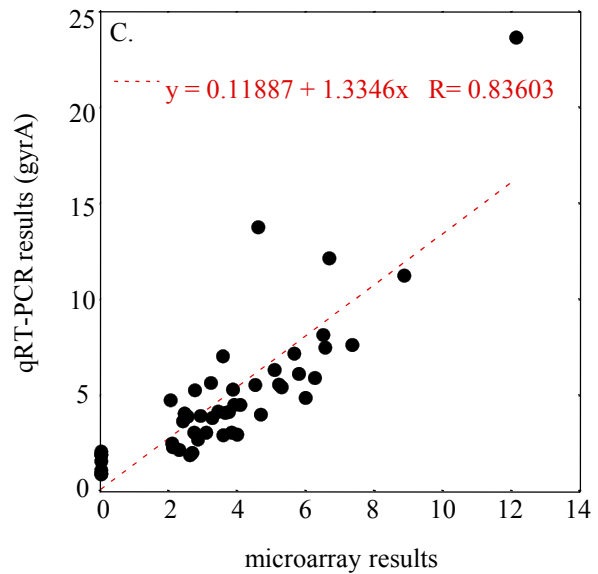

Supplementary Figure 1. Comparison of results from microarray and qRT-PCR analyses of *F. placidus* cells grown on either benzoate or phenol to acetate-grown cells. A) *topR* was used as an external control for qRT-PCR, B) *metG* was used as an external control for qRT-PCR, or C) *gyrA* was used as an external control for qRT-PCR.
