# Supplementary material
Source: PubMed Central journal article supplement (PMC3246244)

Supplementary Figure 3. Detection of phenylphosphate in *F. placidus* cultures growing on 0.5 mM phenol by HPLC.

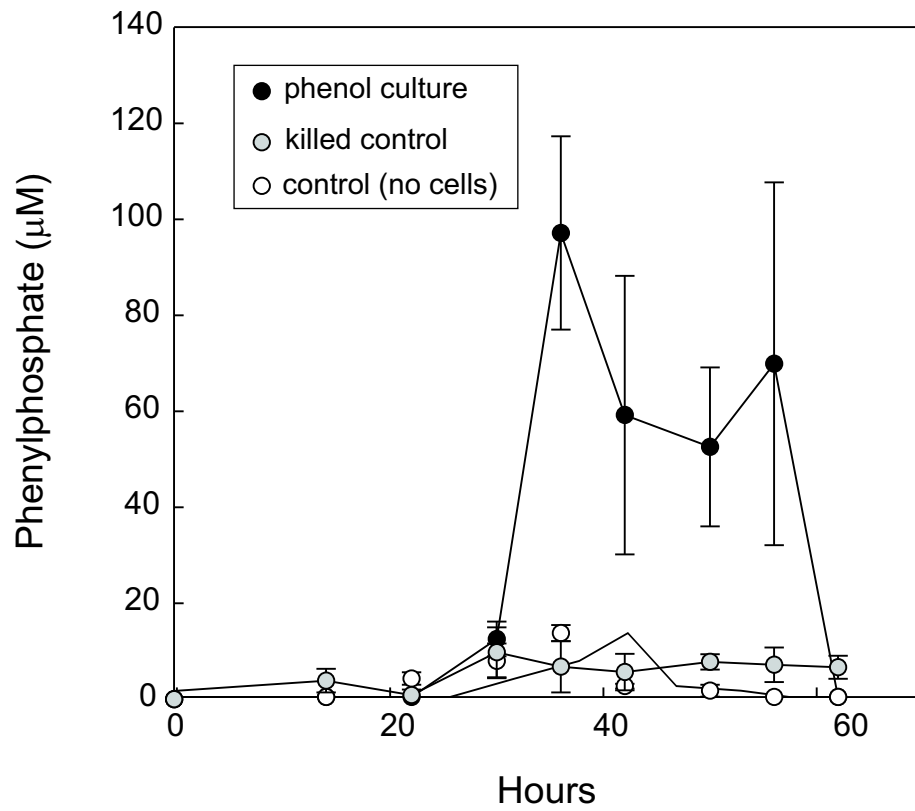

Supplement: ismej201188x3.pdf [file ismej201188x3.pdf]
